# Supplementary material for: Identification of ceftazidime interaction with bacteria in wastewater treatment by Raman spectroscopic mapping
Source: Royal Society of Chemistry journal article supplement (doi:10.1039/c9ra06006e), 2019-01-01
Supplement: c9ra06006e1.pdf [file c9ra06006e1.pdf]

1 **Identification of Ceftazidime Interaction with Bacteria in Wastewater Treatment**

2 **by Raman Spectroscopic Mapping**

3

4

5 Meng-Wen Peng<sup>1, #</sup>, Xiang-Yang Wei<sup>1, #</sup>, Qiang Yu<sup>1</sup>, Peng Yan<sup>1</sup>, You-Peng Chen<sup>1, \*</sup>,

6 Jin-Song Guo<sup>1</sup>

7

8 <sup>1</sup>Key Laboratory of the Three Gorges Reservoir Region's Eco-Environments of MOE,

9 Chongqing University, Chongqing 400045, China

10

11 #Both authors contributed equally to this study

12 \*Corresponding Author

13 Prof. You-Peng Chen

14 Fax: +86-23-65935818, Tel: +86-23-65935818

15 Email: [ypchen@cqu.edu.cn](mailto:ypchen@cqu.edu.cn)

16

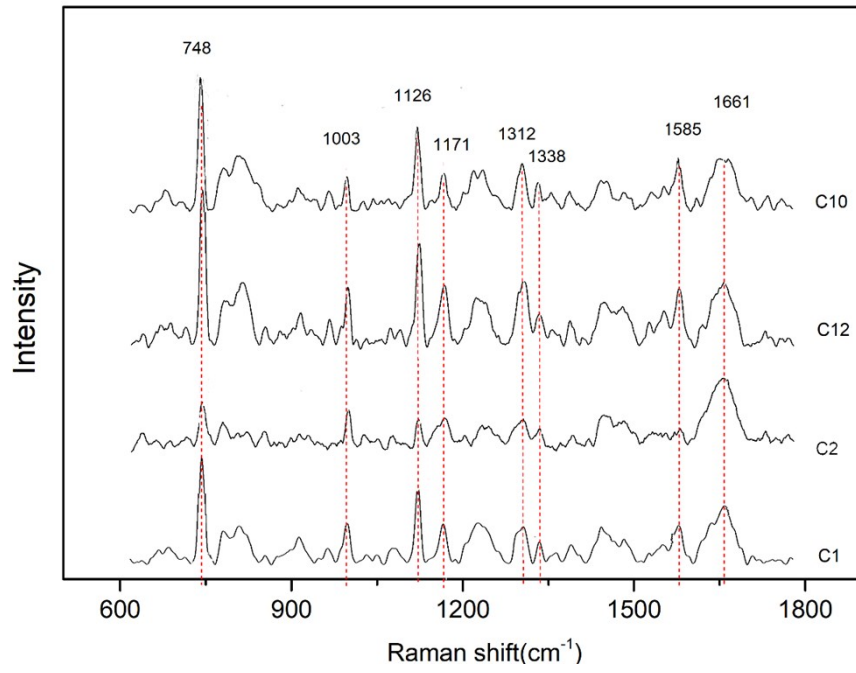

17  
18  
19

Fig. S1 Raman spectra of strains C1, C2, C10, C12.
